# Supplementary material for: Genetic Suppressor Element 1 (GSE1) Promotes the Oncogenic and Recurrent Phenotypes of Castration-Resistant Prostate Cancer by Targeting Tumor-Associated Calcium Signal Transducer 2 (TACSTD2)
Source: MDPI journal article supplement (doi:10.3390/cancers13163959), 2021-08-05
Supplement: s1 [file s1]

**Supplementary Table S1. Molecular parameters of the GSE1-TACSTD2 complex**

| GSE1 - TACSTD2 complex          |      |       |                                |       |       |                                              |       |  |
|---------------------------------|------|-------|--------------------------------|-------|-------|----------------------------------------------|-------|--|
| # Receptor interface residue(s) |      |       | # Ligand interface residue(s): |       |       | # Receptor-ligand interface residue pair(s): |       |  |
| SER                             | 93A  | 4.957 | GLU                            | 1174A | 3.238 | 93A - 1202A                                  | 4.957 |  |
| GLU                             | 94A  | 4.897 | SER                            | 1177A | 4.446 | 94A - 1188A                                  | 4.897 |  |
| HIS                             | 95A  | 0.997 | LYS                            | 1179A | 2.185 | 94A - 1202A                                  | 4.941 |  |
| ALA                             | 96A  | 2.854 | GLN                            | 1180A | 3.676 | 95A - 1188A                                  | 3.307 |  |
| VAL                             | 98A  | 4.143 | ARG                            | 1188A | 3.307 | 95A - 1189A                                  | 3.244 |  |
| ASP                             | 101A | 3.522 | LEU                            | 1189A | 3.244 | 95A - 1202A                                  | 3.992 |  |
| VAL                             | 128A | 4.128 | GLN                            | 1190A | 4.227 | 95A - 1203A                                  | 0.997 |  |
| ASN                             | 129A | 2.837 | ALA                            | 1191A | 3.117 | 96A - 1202A                                  | 2.854 |  |
| VAL                             | 133A | 2.712 | GLU                            | 1192A | 3.569 | 96A - 1203A                                  | 3.438 |  |
| ARG                             | 134A | 2.749 | LEU                            | 1193A | 2.526 | 98A - 1203A                                  | 4.143 |  |
| ARG                             | 135A | 2.860 | ASP                            | 1194A | 4.293 | 98A - 1204A                                  | 4.742 |  |
| THR                             | 136A | 4.142 | LEU                            | 1202A | 2.854 | 101A - 1205A                                 | 4.048 |  |
| ASP                             | 137A | 3.139 | PRO                            | 1203A | 0.997 | 101A - 1207A                                 | 3.522 |  |
| VAL                             | 149A | 4.811 | ALA                            | 1204A | 4.742 | 128A - 1209A                                 | 4.128 |  |
| ARG                             | 159A | 3.238 | MET                            | 1205A | 3.847 | 129A - 1209A                                 | 2.837 |  |
| GLU                             | 227A | 3.340 | TRP                            | 1207A | 3.340 | 133A - 1209A                                 | 2.712 |  |
| GLU                             | 254A | 4.053 | PRO                            | 1208A | 1.740 | 134A - 1194A                                 | 4.558 |  |
| ARG                             | 255A | 3.117 | ARG                            | 1209A | 2.071 | 134A - 1209A                                 | 2.986 |  |
| THR                             | 256A | 4.465 | GLY                            | 1210A | 3.824 | 134A - 1210A                                 | 3.824 |  |
| LEU                             | 257A | 3.214 | TYR                            | 1211A | 2.749 | 134A - 1211A                                 | 2.749 |  |
| ILE                             | 258A | 1.740 | LEU                            | 1212A | 4.903 | 134A - 1212A                                 | 4.903 |  |
| TYR                             | 259A | 2.185 | LYS                            | 1213A | 4.765 | 134A - 1213A                                 | 4.765 |  |
| TYR                             | 260A | 3.472 |                                |       |       | 135A - 1209A                                 | 2.860 |  |
| LEU                             | 261A | 4.906 |                                |       |       | 136A - 1211A                                 | 4.142 |  |
| ASP                             | 262A | 2.071 |                                |       |       | 137A - 1211A                                 | 3.139 |  |
| PRO                             | 266A | 3.855 |                                |       |       | 149A - 1209A                                 | 4.811 |  |
| PHE                             | 268A | 2.912 |                                |       |       | 159A - 1174A                                 | 3.238 |  |
|                                 |      |       |                                |       |       | 227A - 1207A                                 | 3.340 |  |
|                                 |      |       |                                |       |       | 254A - 1189A                                 | 4.053 |  |
|                                 |      |       |                                |       |       | 255A - 1177A                                 | 4.446 |  |
|                                 |      |       |                                |       |       | 255A - 1189A                                 | 3.372 |  |
|                                 |      |       |                                |       |       | 255A - 1190A                                 | 4.227 |  |
|                                 |      |       |                                |       |       | 255A - 1191A                                 | 3.117 |  |
|                                 |      |       |                                |       |       | 256A - 1205A                                 | 4.465 |  |
|                                 |      |       |                                |       |       | 257A - 1179A                                 | 4.168 |  |
|                                 |      |       |                                |       |       | 257A - 1191A                                 | 3.214 |  |
|                                 |      |       |                                |       |       | 257A - 1193A                                 | 3.741 |  |
|                                 |      |       |                                |       |       | 257A - 1205A                                 | 3.847 |  |
|                                 |      |       |                                |       |       | 258A - 1193A                                 | 3.520 |  |
|                                 |      |       |                                |       |       | 258A - 1207A                                 | 4.126 |  |
|                                 |      |       |                                |       |       | 258A - 1208A                                 | 1.740 |  |
|                                 |      |       |                                |       |       | 259A - 1179A                                 | 2.185 |  |
|                                 |      |       |                                |       |       | 259A - 1180A                                 | 3.676 |  |
|                                 |      |       |                                |       |       | 259A - 1192A                                 | 3.569 |  |
|                                 |      |       |                                |       |       | 259A - 1193A                                 | 2.526 |  |
|                                 |      |       |                                |       |       | 259A - 1208A                                 | 3.564 |  |
|                                 |      |       |                                |       |       | 260A - 1207A                                 | 3.926 |  |
|                                 |      |       |                                |       |       | 260A - 1208A                                 | 3.472 |  |
|                                 |      |       |                                |       |       | 260A - 1209A                                 | 4.484 |  |
|                                 |      |       |                                |       |       | 261A - 1209A                                 | 4.906 |  |
|                                 |      |       |                                |       |       | 262A - 1209A                                 | 2.071 |  |
|                                 |      |       |                                |       |       | 266A - 1209A                                 | 3.855 |  |
|                                 |      |       |                                |       |       | 268A - 1194A                                 | 4.293 |  |
|                                 |      |       |                                |       |       | 268A - 1209A                                 | 4.532 |  |
|                                 |      |       |                                |       |       | 268A - 1211A                                 | 2.912 |  |
